# Supplementary material for: Bioconversion of Agroindustrial Waste in the Production of Bioemulsifier by Stenotrophomonas maltophilia UCP 1601 and Application in Bioremediation Process
Source: Hindawi journal article supplement (doi:10.1155/2020/9434059), 2020-01-31

**Supplementary material**

**Table 3.** Values of emulsification index obtained experimentally and predicted by the statistical model used to analyze the 24 FFD.

| **Assays** | **Emulsification index (%)** | |
| --- | --- | --- |
| **Experimental** | **Predicted** |
| 1 | 53.84 | 53.51 |
| 2 | 60.71 | 61.04 |
| 3 | 61.90 | 62.23 |
| 4 | 81.97 | 81.64 |
| 5 | 68.00 | 68.33 |
| 6 | 82.74 | 82.41 |
| 7 | 76.42 | 76.09 |
| 8 | 40.62 | 40.95 |
| 9 | 72.41 | 72.74 |
| 10 | 59.09 | 58.76 |
| 11 | 63.81 | 63.48 |
| 12 | 78.94 | 79.27 |
| 13 | 42.85 | 42.52 |
| 14 | 79.44 | 79.77 |
| 15 | 59.09 | 59.42 |
| 16 | 65.62 | 65.29 |

**INSERT Figure 2**

**Table 4.** ANOVA obtained from the results obtained in the 24 FFD to analyze the influence of the independent variables (glucose, peptone, ZnCl2 and MgSO4) on the dependent variable (emulsification index).

| **Effect** | **Sum of square** | **Degree of freedom** | **Mean square** | **F** | ***p*-value** |
| --- | --- | --- | --- | --- | --- |
| (1) Glucose | 161.354 | 1 | 161.3535 | 94.3833 | 0.065299 |
| (2) Peptone | 5.394 | 1 | 5.3940 | 3.1552 | 0.326425 |
| (3) ZnCl2 | 20.003 | 1 | 20.0033 | 11.7008 | 0.181065 |
| (4) MgSO4 | 1.531 | 1 | 1.5314 | 0.8958 | 0.517506 |
| 1x2 | 94.819 | 1 | 94.8189 | 55.4640 | 0.084974 |
| 1x3 | 2.797 | 1 | 2.7973 | 1.6362 | 0.422411 |
| 1x4 | 95.306 | 1 | 95.3064 | 55.7492 | 0.084759 |
| 2x3 | 322.651 | 1 | 322.6514 | 188.7340 | 0.046258 |
| 2x4 | 20.363 | 1 | 20.3627 | 11.9111 | 0.179544 |
| 3x4 | 83.768 | 1 | 83.7683 | 49.0000 | 0.090334 |
| 1x2x3 | 934.066 | 1 | 934.0664 | 546.3795 | 0.027219 |
| 1x2x4 | 79.790 | 1 | 79.7896 | 46.6727 | 0.092528 |
| 1x3x4 | 498.517 | 1 | 498.5173 | 291.6062 | 0.037238 |
| 2x3x4 | 183.535 | 1 | 183.5348 | 107.3581 | 0.061252 |
| Error | 1.710 | 1 | 1.7096 |  |  |
| Total | 2505.605 | 15 |  |  |  |

ANOVA; Var.: Emulsification index; R2=0.99932; Adj.:0.98977; MS residual error =

1.709556.

**Figure 2**. Predicted values versus observed values by model for the response variable (emulsification index) from the results obtained in the 24 FFD.


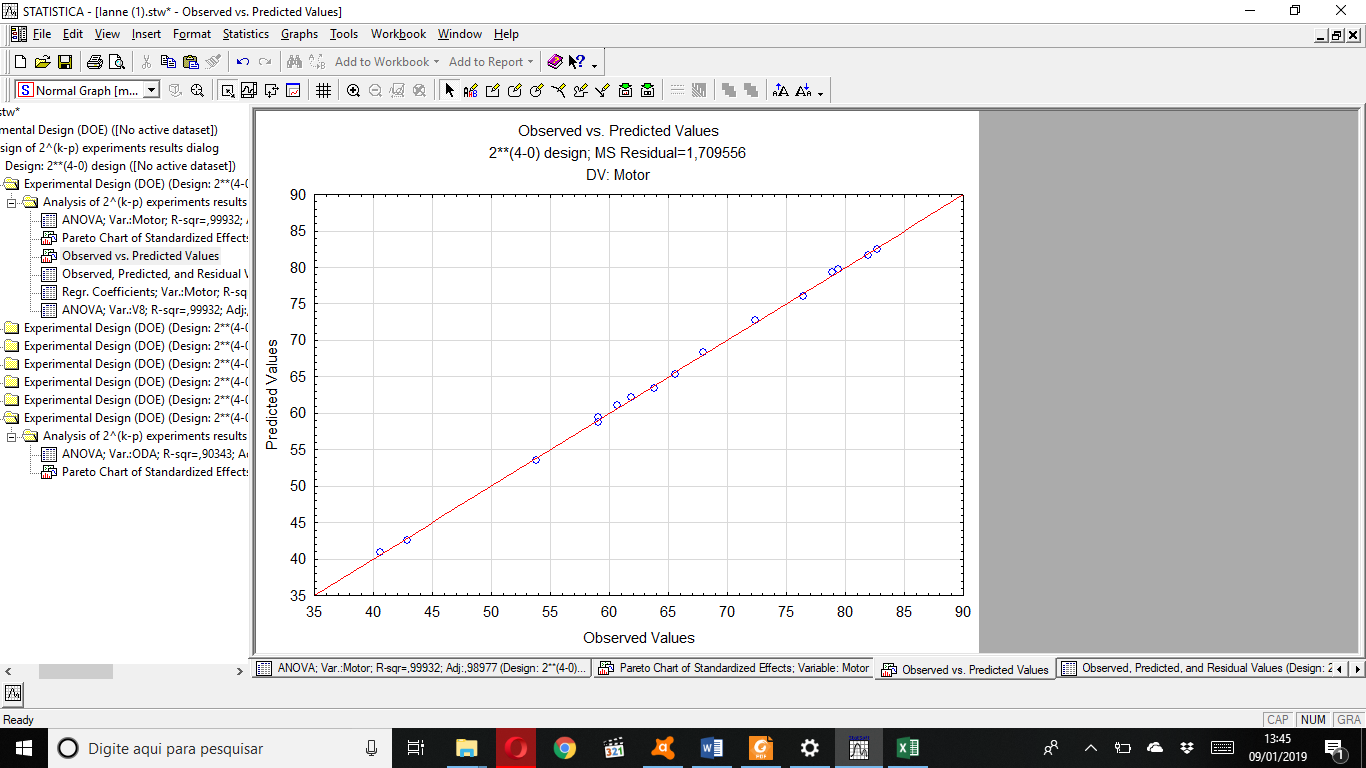

Supplement: f1 [file 9434059.f1.docx]
